# Supplementary material
Source: publisher figshare collection journal article supplement (https://acs.figshare.com/ndownloader/files/4023604)
Supplement: Supplementary file 1 [file 4023604]

 
data_compoundcis6
 
_audit_creation_method                  'WinGX routine CIF_UPDATE'
_audit_conform_dict_name                cif_core.dic
_audit_conform_dict_version             2.4
_audit_conform_dict_location            ftp://ftp.iucr.org/pub/cif_core.dic
_publ_requested_category                FM
 
#----------------------------------------------------------------------------#
#                   CHEMICAL INFORMATION                                     #
#----------------------------------------------------------------------------#
 
_chemical_name_systematic
;
 ?
;
_chemical_formula_moiety                'C27 H29 Fe2 O7 P, C H2 Cl2'
_chemical_formula_sum                   'C28 H31 Cl2 Fe2 O7 P'
_chemical_formula_weight                693.10
_chemical_compound_source               'synthesis as described'
 
#----------------------------------------------------------------------------#
#                   UNIT CELL INFORMATION                                    #
#----------------------------------------------------------------------------#
 
_symmetry_cell_setting                  monoclinic
_symmetry_space_group_name_H-M          'P 1 21/c 1'
_symmetry_space_group_name_Hall         '-P 2ybc'
_symmetry_Int_Tables_number             14
loop_
    _symmetry_equiv_pos_as_xyz
'x, y, z'
'-x, y+1/2, -z+1/2'
'-x, -y, -z'
'x, -y-1/2, z-1/2'
 
_cell_length_a                          9.5419(17)
_cell_length_b                          24.032(4)
_cell_length_c                          12.901(2)
_cell_angle_alpha                       90
_cell_angle_beta                        94.136(3)
_cell_angle_gamma                       90
_cell_volume                            2950.7(9)
_cell_formula_units_Z                   4
_cell_measurement_temperature           100.0(1)
_cell_measurement_reflns_used           1381
_cell_measurement_theta_min             2.73
_cell_measurement_theta_max             27.6345
_cell_measurement_wavelength            0.71073
 
#----------------------------------------------------------------------------#
#                   CRYSTAL INFORMATION                                      #
#----------------------------------------------------------------------------#
 
_exptl_crystal_description              prism
_exptl_crystal_colour                   green
_exptl_crystal_size_max                 0.32
_exptl_crystal_size_mid                 0.16
_exptl_crystal_size_min                 0.16
_exptl_crystal_density_diffrn           1.56
_exptl_crystal_density_method           'not measured'
_exptl_crystal_F_000                    1424
_exptl_special_details
;
 ?
;
 
#----------------------------------------------------------------------------#
#                   ABSORPTION CORRECTION                                    #
#----------------------------------------------------------------------------#
 
_exptl_absorpt_coefficient_mu           1.263
_exptl_absorpt_correction_type          multi-scan
_exptl_absorpt_process_details		'BRUKER Sadabs'
_exptl_absorpt_correction_T_min         0.797440
_exptl_absorpt_correction_T_max         1
 
#----------------------------------------------------------------------------#
#                   DATA COLLECTION                                          #
#----------------------------------------------------------------------------#
 
_diffrn_ambient_temperature             100.0(1)
_diffrn_radiation_wavelength            0.71073
_diffrn_radiation_source                'fine-focus sealed tube'
_diffrn_radiation_type                  MoK\a
_diffrn_radiation_monochromador         graphite
_diffrn_measurement_device_type         'Smart-CCD-1000 BRUKER'
_diffrn_measurement_method              'omega scans'
_diffrn_radiation_probe                 x-ray
_diffrn_reflns_av_R_equivalents         0.0397
_diffrn_reflns_av_unetI/netI            0.0338
_diffrn_reflns_number                   27868
_diffrn_reflns_limit_h_min              -12
_diffrn_reflns_limit_h_max              12
_diffrn_reflns_limit_k_min              0
_diffrn_reflns_limit_k_max              30
_diffrn_reflns_limit_l_min              0
_diffrn_reflns_limit_l_max              16
_diffrn_reflns_theta_min                1.69
_diffrn_reflns_theta_max                26.73
_diffrn_reflns_theta_full               26.73
_diffrn_measured_fraction_theta_full
                                        0.999
_diffrn_measured_fraction_theta_max
                                        0.999
_reflns_number_total                    6247
_reflns_number_gt                       5083
_reflns_threshold_expression            >2\s(I)
 
#----------------------------------------------------------------------------#
#                   COMPUTER PROGRAMS USED                                   #
#----------------------------------------------------------------------------#
 
_computing_data_collection              'Brucker Smart'
_computing_cell_refinement              'Brucker Smart'
_computing_data_reduction               'Brucker Smart'
_computing_structure_solution           'SHELXL-97 (Sheldrick, 2008)'
_computing_structure_refinement         'SHELXL-97 (Sheldrick, 2008)'
_computing_molecular_graphics           'Ortep-3 for Windows (Farrugia, 1997)'
_computing_publication_material
                                   'WinGX publication routines (Farrugia, 1999)'
 
#----------------------------------------------------------------------------#
#                   STRUCTURE SOLUTION
#----------------------------------------------------------------------------#
 
_atom_sites_solution_primary            direct
_atom_sites_solution_secondary          difmap
_atom_sites_solution_hydrogens          geom
 
#----------------------------------------------------------------------------#
#                   REFINEMENT INFORMATION                                   #
#----------------------------------------------------------------------------#
 
_refine_special_details
;
 Refinement of F^2^ against ALL reflections.  The weighted R-factor wR and
 goodness of fit S are based on F^2^, conventional R-factors R are based
 on F, with F set to zero for negative F^2^. The threshold expression of
 F^2^ > 2\s(F^2^) is used only for calculating R-factors(gt) etc. and is
 not relevant to the choice of reflections for refinement.  R-factors based
 on F^2^ are statistically about twice as large as those based on F, and R-
 factors based on ALL data will be even larger.
;
_refine_ls_structure_factor_coef        Fsqd
_refine_ls_matrix_type                  full
_refine_ls_weighting_scheme             calc
_refine_ls_weighting_details
         'calc w=1/[\s^2^(Fo^2^)+(0.1008P)^2^+7.2939P] where P=(Fo^2^+2Fc^2^)/3'
_refine_ls_hydrogen_treatment           mixed
_refine_ls_extinction_method            none
_refine_ls_number_reflns                6247
_refine_ls_number_parameters            368
_refine_ls_number_restraints            5
_refine_ls_R_factor_all                 0.0706
_refine_ls_R_factor_gt                  0.0584
_refine_ls_wR_factor_ref                0.1761
_refine_ls_wR_factor_gt                 0.1669
_refine_ls_goodness_of_fit_ref          1.103
_refine_ls_restrained_S_all             1.13
_refine_ls_shift/su_max                 0.01
_refine_ls_shift/su_mean                0
_refine_diff_density_max                1.151
_refine_diff_density_min                -1.753
_refine_diff_density_rms                0.133
 
#----------------------------------------------------------------------------#
#                   ATOMIC TYPES, COORDINATES AND THERMAL PARAMETERS         #
#----------------------------------------------------------------------------#
 
loop_
    _atom_type_symbol
    _atom_type_description
    _atom_type_scat_dispersion_real
    _atom_type_scat_dispersion_imag
    _atom_type_scat_source
C C 0.0033 0.0016 'International Tables Vol C Tables 4.2.6.8 and 6.1.1.4'
H H 0 0 'International Tables Vol C Tables 4.2.6.8 and 6.1.1.4'
Fe Fe 0.3463 0.8444 'International Tables Vol C Tables 4.2.6.8 and 6.1.1.4'
O O 0.0106 0.006 'International Tables Vol C Tables 4.2.6.8 and 6.1.1.4'
P P 0.1023 0.0942 'International Tables Vol C Tables 4.2.6.8 and 6.1.1.4'
Cl Cl 0.1484 0.1585 'International Tables Vol C Tables 4.2.6.8 and 6.1.1.4'
 
loop_
    _atom_site_label
    _atom_site_type_symbol
    _atom_site_fract_x
    _atom_site_fract_y
    _atom_site_fract_z
    _atom_site_U_iso_or_equiv
    _atom_site_adp_type
    _atom_site_occupancy
    _atom_site_symmetry_multiplicity
    _atom_site_calc_flag
    _atom_site_refinement_flags
    _atom_site_disorder_assembly
    _atom_site_disorder_group
Fe1 Fe 0.58156(6) 0.61059(2) 0.02044(4) 0.01371(17) Uani 1 1 d . . .
Fe2 Fe 0.59468(6) 0.67460(2) -0.13371(4) 0.01314(17) Uani 1 1 d . . .
P1 P 0.39121(11) 0.67260(4) -0.22092(8) 0.0161(2) Uani 1 1 d . . .
O1 O 0.2942(3) 0.57898(14) 0.0496(2) 0.0284(7) Uani 1 1 d . . .
O2 O 0.5993(3) 0.55648(12) -0.1810(2) 0.0220(6) Uani 1 1 d . . .
O3 O 0.4745(3) 0.72267(12) 0.0469(2) 0.0222(6) Uani 1 1 d . . .
O4 O 0.0169(3) 0.56779(14) -0.0901(3) 0.0310(7) Uani 1 1 d . . .
O5 O 0.0374(3) 0.51137(13) -0.2254(3) 0.0267(7) Uani 1 1 d . . .
O6 O 0.5093(4) 0.62443(15) -0.5833(3) 0.0384(8) Uani 1 1 d . . .
O7 O 0.3924(4) 0.54783(15) -0.5400(2) 0.0342(8) Uani 1 1 d . . .
C1 C 0.4055(4) 0.59185(16) 0.0294(3) 0.0187(8) Uani 1 1 d . . .
C2 C 0.5915(4) 0.59543(16) -0.1267(3) 0.0155(8) Uani 1 1 d . . .
C3 C 0.5224(4) 0.68704(16) -0.0034(3) 0.0171(8) Uani 1 1 d . . .
C4 C 0.7459(4) 0.55188(18) 0.0587(3) 0.0226(9) Uani 1 1 d . . .
H4 H 0.7756 0.5243 0.0147 0.027 Uiso 1 1 calc R . .
C5 C 0.8008(4) 0.60612(17) 0.0695(3) 0.0207(8) Uani 1 1 d . . .
H5 H 0.8725 0.6208 0.0327 0.025 Uiso 1 1 calc R . .
C6 C 0.7292(5) 0.63465(18) 0.1455(3) 0.0225(9) Uani 1 1 d . . .
H6 H 0.7459 0.671 0.1678 0.027 Uiso 1 1 calc R . .
C7 C 0.6285(5) 0.5983(2) 0.1810(3) 0.0254(9) Uani 1 1 d . . .
H7 H 0.5663 0.6062 0.2313 0.031 Uiso 1 1 calc R . .
C8 C 0.6381(5) 0.54723(19) 0.1264(3) 0.0261(9) Uani 1 1 d . . .
H8 H 0.5824 0.516 0.1343 0.031 Uiso 1 1 calc R . .
C9 C 0.6567(5) 0.7287(2) -0.2495(4) 0.0351(12) Uani 1 1 d . . .
H9 H 0.5968 0.7404 -0.3053 0.042 Uiso 1 1 calc R . .
C10 C 0.6752(5) 0.75557(19) -0.1512(4) 0.0322(11) Uani 1 1 d . . .
H10 H 0.6315 0.788 -0.1309 0.039 Uiso 1 1 calc R . .
C11 C 0.7733(5) 0.7230(2) -0.0907(4) 0.0289(10) Uani 1 1 d . . .
H11 H 0.8051 0.73 -0.0221 0.035 Uiso 1 1 calc R . .
C12 C 0.8146(5) 0.6785(2) -0.1515(4) 0.0327(11) Uani 1 1 d . . .
H12 H 0.8792 0.6511 -0.1304 0.039 Uiso 1 1 calc R . .
C13 C 0.7427(5) 0.6822(2) -0.2483(4) 0.0364(12) Uani 1 1 d . . .
H13 H 0.7508 0.6577 -0.3033 0.044 Uiso 1 1 calc R . .
C14 C 0.2521(5) 0.62849(18) -0.1791(4) 0.0291(10) Uani 1 1 d . . .
C15 C 0.1918(5) 0.5851(2) -0.2087(5) 0.0396(14) Uani 1 1 d . . .
C16 C 0.0730(4) 0.55483(18) -0.1664(4) 0.0229(9) Uani 1 1 d . . .
C17 C -0.0783(5) 0.47899(19) -0.1888(4) 0.0314(11) Uani 1 1 d . . .
H17A H -0.0517 0.4645 -0.1209 0.047 Uiso 1 1 calc R . .
H17B H -0.0999 0.4488 -0.2359 0.047 Uiso 1 1 calc R . .
H17C H -0.1594 0.5024 -0.1856 0.047 Uiso 1 1 calc R . .
C18 C 0.4096(5) 0.6457(2) -0.3476(4) 0.0316(11) Uani 1 1 d D . .
C19 C 0.4170(6) 0.6195(2) -0.4209(4) 0.0422(14) Uani 1 1 d D . .
C20 C 0.4463(5) 0.5986(2) -0.5234(4) 0.0302(11) Uani 1 1 d . . .
C21 C 0.4202(6) 0.5233(2) -0.6390(4) 0.0334(11) Uani 1 1 d . . .
H21A H 0.3747 0.5448 -0.6943 0.05 Uiso 1 1 calc R . .
H21B H 0.3847 0.4859 -0.6422 0.05 Uiso 1 1 calc R . .
H21C H 0.5197 0.5228 -0.646 0.05 Uiso 1 1 calc R . .
C22 C 0.2951(4) 0.73808(16) -0.2501(3) 0.0172(8) Uani 1 1 d . . .
H22 H 0.3591 0.7627 -0.2847 0.021 Uiso 1 1 calc R . .
C23 C 0.1643(5) 0.73085(18) -0.3245(4) 0.0260(9) Uani 1 1 d . . .
H23A H 0.1907 0.7144 -0.389 0.031 Uiso 1 1 calc R . .
H23B H 0.0992 0.7058 -0.2939 0.031 Uiso 1 1 calc R . .
C24 C 0.0929(5) 0.7867(2) -0.3471(4) 0.0316(11) Uani 1 1 d . . .
H24A H 0.1549 0.8104 -0.384 0.038 Uiso 1 1 calc R . .
H24B H 0.0077 0.781 -0.3915 0.038 Uiso 1 1 calc R . .
C25 C 0.0566(5) 0.8155(2) -0.2482(4) 0.0331(11) Uani 1 1 d . . .
H25A H -0.0117 0.7934 -0.214 0.04 Uiso 1 1 calc R . .
H25B H 0.0149 0.8515 -0.2649 0.04 Uiso 1 1 calc R . .
C26 C 0.1887(5) 0.82326(19) -0.1746(4) 0.0334(11) Uani 1 1 d . . .
H26A H 0.2539 0.8476 -0.2069 0.04 Uiso 1 1 calc R . .
H26B H 0.1632 0.8407 -0.1109 0.04 Uiso 1 1 calc R . .
C27 C 0.2599(5) 0.76741(18) -0.1492(3) 0.0225(9) Uani 1 1 d . . .
H27A H 0.1979 0.7441 -0.1116 0.027 Uiso 1 1 calc R . .
H27B H 0.3454 0.7734 -0.1053 0.027 Uiso 1 1 calc R . .
C98 C 0.1148(17) 0.4311(6) 0.4714(12) 0.104(5) Uiso 0.7 1 d PD A 1
H98A H 0.1641 0.4309 0.4083 0.125 Uiso 0.7 1 calc PR A 1
H98B H 0.0294 0.4519 0.4532 0.125 Uiso 0.7 1 calc PR A 1
Cl1 Cl 0.1948(6) 0.4716(2) 0.5317(4) 0.1258(15) Uiso 0.7 1 d PD A 1
Cl2 Cl 0.0542(6) 0.3679(2) 0.4711(5) 0.1369(17) Uiso 0.7 1 d PD A 1
C98B C 0.099(4) 0.4271(11) 0.5955(19) 0.102(11) Uiso 0.3 1 d PD B 2
H98C H 0.1802 0.4473 0.6256 0.123 Uiso 0.3 1 calc PR B 2
H98D H 0.0444 0.4136 0.6508 0.123 Uiso 0.3 1 calc PR B 2
Cl1B Cl -0.0024(15) 0.4684(5) 0.5078(11) 0.137(4) Uiso 0.3 1 d PD . 2
Cl2B Cl 0.1466(17) 0.3756(6) 0.5204(12) 0.154(5) Uiso 0.3 1 d PD B 2
H14 H 0.206(7) 0.645(3) -0.109(5) 0.06(2) Uiso 1 1 d . . .
H15 H 0.231(7) 0.564(3) -0.281(5) 0.06(2) Uiso 1 1 d . . .
 
loop_
    _atom_site_aniso_label
    _atom_site_aniso_U_11
    _atom_site_aniso_U_22
    _atom_site_aniso_U_33
    _atom_site_aniso_U_23
    _atom_site_aniso_U_13
    _atom_site_aniso_U_12
Fe1 0.0166(3) 0.0118(3) 0.0127(3) -0.0002(2) 0.0012(2) -0.0004(2)
Fe2 0.0152(3) 0.0122(3) 0.0121(3) 0.00026(19) 0.0010(2) -0.0003(2)
P1 0.0182(5) 0.0139(5) 0.0158(5) -0.0040(4) -0.0025(4) 0.0018(4)
O1 0.0222(16) 0.0358(18) 0.0276(17) 0.0053(14) 0.0050(13) -0.0057(14)
O2 0.0300(16) 0.0170(14) 0.0191(14) -0.0051(12) 0.0020(12) 0.0031(12)
O3 0.0317(16) 0.0191(14) 0.0155(14) -0.0054(11) -0.0011(12) 0.0066(12)
O4 0.0295(17) 0.0259(17) 0.0374(19) -0.0022(14) 0.0010(14) 0.0032(13)
O5 0.0218(15) 0.0267(16) 0.0322(17) -0.0034(13) 0.0056(13) -0.0050(13)
O6 0.046(2) 0.0273(18) 0.041(2) -0.0051(16) 0.0011(17) -0.0014(16)
O7 0.051(2) 0.0325(19) 0.0193(16) -0.0111(14) 0.0051(14) -0.0046(16)
C1 0.026(2) 0.0160(19) 0.0140(18) 0.0010(15) 0.0002(15) -0.0015(16)
C2 0.0160(18) 0.0158(19) 0.0149(18) 0.0008(15) 0.0015(14) 0.0009(14)
C3 0.021(2) 0.0154(18) 0.0150(18) -0.0013(15) 0.0004(15) -0.0024(15)
C4 0.025(2) 0.020(2) 0.022(2) 0.0016(16) -0.0036(16) 0.0075(17)
C5 0.0170(19) 0.023(2) 0.022(2) 0.0041(16) -0.0039(16) 0.0018(16)
C6 0.026(2) 0.022(2) 0.018(2) -0.0016(16) -0.0088(16) 0.0026(17)
C7 0.028(2) 0.033(2) 0.015(2) 0.0068(17) 0.0010(16) 0.0048(19)
C8 0.026(2) 0.023(2) 0.027(2) 0.0118(18) -0.0063(18) -0.0018(18)
C9 0.023(2) 0.055(3) 0.027(2) 0.026(2) -0.0027(18) -0.009(2)
C10 0.028(2) 0.015(2) 0.055(3) 0.010(2) 0.014(2) -0.0010(18)
C11 0.026(2) 0.033(2) 0.027(2) 0.0071(19) -0.0034(18) -0.0167(19)
C12 0.018(2) 0.030(2) 0.051(3) 0.016(2) 0.008(2) 0.0021(18)
C13 0.033(3) 0.044(3) 0.034(3) -0.005(2) 0.018(2) -0.009(2)
C14 0.025(2) 0.017(2) 0.042(3) 0.0025(19) -0.016(2) 0.0029(17)
C15 0.027(2) 0.030(3) 0.059(4) 0.026(3) -0.015(2) -0.011(2)
C16 0.018(2) 0.019(2) 0.030(2) 0.0083(18) -0.0049(17) 0.0004(16)
C17 0.022(2) 0.019(2) 0.053(3) -0.004(2) 0.005(2) -0.0078(18)
C18 0.029(2) 0.035(3) 0.028(2) -0.015(2) -0.0155(19) 0.016(2)
C19 0.041(3) 0.049(3) 0.033(3) -0.024(3) -0.015(2) 0.024(3)
C20 0.035(3) 0.029(2) 0.025(2) -0.013(2) -0.013(2) 0.012(2)
C21 0.053(3) 0.026(2) 0.022(2) -0.0114(19) 0.002(2) -0.001(2)
C22 0.021(2) 0.0136(18) 0.0167(19) 0.0014(15) 0.0007(15) 0.0014(15)
C23 0.030(2) 0.022(2) 0.025(2) -0.0031(17) -0.0099(18) 0.0054(18)
C24 0.033(3) 0.027(2) 0.033(3) 0.002(2) -0.015(2) 0.006(2)
C25 0.029(2) 0.023(2) 0.046(3) 0.002(2) -0.010(2) 0.0088(19)
C26 0.035(3) 0.022(2) 0.041(3) -0.010(2) -0.013(2) 0.0114(19)
C27 0.023(2) 0.024(2) 0.020(2) -0.0056(17) -0.0048(16) 0.0080(17)
 
 
#----------------------------------------------------------------------------#
#                   MOLECULAR GEOMETRY                                       #
#----------------------------------------------------------------------------#
 
_geom_special_details
;
 All s.u.'s (except the s.u. in the dihedral angle between two l.s. planes)
 are estimated using the full covariance matrix.  The cell s.u.'s are taken
 into account individually in the estimation of s.u.'s in distances, angles
 and torsion angles; correlations between s.u.'s in cell parameters are only
 used when they are defined by crystal symmetry.  An approximate (isotropic)
 treatment of cell s.u.'s is used for estimating s.u.'s involving l.s. planes.
;
loop_
    _geom_bond_atom_site_label_1
    _geom_bond_atom_site_label_2
    _geom_bond_distance
    _geom_bond_site_symmetry_2
    _geom_bond_publ_flag
Fe1 C1 1.751(4) . ?
Fe1 C3 1.940(4) . ?
Fe1 C2 1.942(4) . ?
Fe1 C8 2.091(4) . ?
Fe1 C7 2.108(4) . ?
Fe1 C4 2.140(4) . ?
Fe1 C6 2.143(4) . ?
Fe1 C5 2.144(4) . ?
Fe1 Fe2 2.5246(8) . ?
Fe2 C3 1.887(4) . ?
Fe2 C2 1.905(4) . ?
Fe2 C9 2.097(4) . ?
Fe2 C11 2.105(4) . ?
Fe2 C10 2.110(4) . ?
Fe2 C13 2.125(5) . ?
Fe2 C12 2.129(5) . ?
Fe2 P1 2.1732(12) . ?
P1 C18 1.778(5) . ?
P1 C14 1.811(5) . ?
P1 C22 1.846(4) . ?
O1 C1 1.154(5) . ?
O2 C2 1.174(5) . ?
O3 C3 1.185(5) . ?
O4 C16 1.195(6) . ?
O5 C16 1.322(5) . ?
O5 C17 1.456(5) . ?
O6 C20 1.188(6) . ?
O7 C20 1.335(6) . ?
O7 C21 1.448(5) . ?
C4 C8 1.401(6) . ?
C4 C5 1.408(6) . ?
C4 H4 0.93 . ?
C5 C6 1.412(6) . ?
C5 H5 0.93 . ?
C6 C7 1.399(6) . ?
C6 H6 0.93 . ?
C7 C8 1.423(7) . ?
C7 H7 0.93 . ?
C8 H8 0.93 . ?
C9 C13 1.386(8) . ?
C9 C10 1.422(8) . ?
C9 H9 0.93 . ?
C10 C11 1.411(7) . ?
C10 H10 0.93 . ?
C11 C12 1.400(7) . ?
C11 H11 0.93 . ?
C12 C13 1.384(8) . ?
C12 H12 0.93 . ?
C13 H13 0.93 . ?
C14 C15 1.238(7) . ?
C14 H14 1.10(7) . ?
C15 C16 1.482(6) . ?
C15 H15 1.15(7) . ?
C17 H17A 0.96 . ?
C17 H17B 0.96 . ?
C17 H17C 0.96 . ?
C18 C19 1.143(6) . ?
C19 C20 1.460(7) . ?
C21 H21A 0.96 . ?
C21 H21B 0.96 . ?
C21 H21C 0.96 . ?
C22 C23 1.528(6) . ?
C22 C27 1.539(5) . ?
C22 H22 0.98 . ?
C23 C24 1.525(6) . ?
C23 H23A 0.97 . ?
C23 H23B 0.97 . ?
C24 C25 1.514(7) . ?
C24 H24A 0.97 . ?
C24 H24B 0.97 . ?
C25 C26 1.533(7) . ?
C25 H25A 0.97 . ?
C25 H25B 0.97 . ?
C26 C27 1.529(6) . ?
C26 H26A 0.97 . ?
C26 H26B 0.97 . ?
C27 H27A 0.97 . ?
C27 H27B 0.97 . ?
C98 Cl1 1.432(12) . ?
C98 Cl2 1.625(12) . ?
C98 H98A 0.97 . ?
C98 H98B 0.97 . ?
C98B Cl2B 1.655(18) . ?
C98B Cl1B 1.745(18) . ?
C98B H98C 0.97 . ?
C98B H98D 0.97 . ?
Cl1B Cl1B 1.54(2) 3_566 ?
 
loop_
    _geom_angle_atom_site_label_1
    _geom_angle_atom_site_label_2
    _geom_angle_atom_site_label_3
    _geom_angle
    _geom_angle_site_symmetry_1
    _geom_angle_site_symmetry_3
    _geom_angle_publ_flag
C1 Fe1 C3 89.10(18) . . ?
C1 Fe1 C2 97.54(17) . . ?
C3 Fe1 C2 93.27(16) . . ?
C1 Fe1 C8 88.46(18) . . ?
C3 Fe1 C8 148.38(18) . . ?
C2 Fe1 C8 118.29(18) . . ?
C1 Fe1 C7 92.05(18) . . ?
C3 Fe1 C7 109.05(17) . . ?
C2 Fe1 C7 155.85(18) . . ?
C8 Fe1 C7 39.60(18) . . ?
C1 Fe1 C4 120.37(18) . . ?
C3 Fe1 C4 149.42(17) . . ?
C2 Fe1 C4 90.86(16) . . ?
C8 Fe1 C4 38.64(17) . . ?
C7 Fe1 C4 65.26(17) . . ?
C1 Fe1 C6 126.95(18) . . ?
C3 Fe1 C6 91.81(17) . . ?
C2 Fe1 C6 135.28(17) . . ?
C8 Fe1 C6 65.15(17) . . ?
C7 Fe1 C6 38.42(18) . . ?
C4 Fe1 C6 64.76(16) . . ?
C1 Fe1 C5 152.59(17) . . ?
C3 Fe1 C5 111.16(16) . . ?
C2 Fe1 C5 99.43(16) . . ?
C8 Fe1 C5 64.54(17) . . ?
C7 Fe1 C5 64.49(17) . . ?
C4 Fe1 C5 38.38(16) . . ?
C6 Fe1 C5 38.46(16) . . ?
C1 Fe1 Fe2 108.13(13) . . ?
C3 Fe1 Fe2 47.83(12) . . ?
C2 Fe1 Fe2 48.36(12) . . ?
C8 Fe1 Fe2 159.01(14) . . ?
C7 Fe1 Fe2 147.14(13) . . ?
C4 Fe1 Fe2 120.41(12) . . ?
C6 Fe1 Fe2 111.18(12) . . ?
C5 Fe1 Fe2 99.23(12) . . ?
C3 Fe2 C2 96.20(17) . . ?
C3 Fe2 C9 132.6(2) . . ?
C2 Fe2 C9 131.2(2) . . ?
C3 Fe2 C11 91.06(18) . . ?
C2 Fe2 C11 123.71(18) . . ?
C9 Fe2 C11 65.17(18) . . ?
C3 Fe2 C10 96.23(19) . . ?
C2 Fe2 C10 158.93(17) . . ?
C9 Fe2 C10 39.5(2) . . ?
C11 Fe2 C10 39.12(19) . . ?
C3 Fe2 C13 155.59(19) . . ?
C2 Fe2 C13 97.61(19) . . ?
C9 Fe2 C13 38.3(2) . . ?
C11 Fe2 C13 64.5(2) . . ?
C10 Fe2 C13 65.2(2) . . ?
C3 Fe2 C12 121.0(2) . . ?
C2 Fe2 C12 93.90(17) . . ?
C9 Fe2 C12 64.22(19) . . ?
C11 Fe2 C12 38.6(2) . . ?
C10 Fe2 C12 65.09(18) . . ?
C13 Fe2 C12 38.0(2) . . ?
C3 Fe2 P1 95.41(13) . . ?
C2 Fe2 P1 89.18(12) . . ?
C9 Fe2 P1 86.14(13) . . ?
C11 Fe2 P1 145.58(14) . . ?
C10 Fe2 P1 106.48(15) . . ?
C13 Fe2 P1 104.80(16) . . ?
C12 Fe2 P1 142.73(15) . . ?
C3 Fe2 Fe1 49.64(12) . . ?
C2 Fe2 Fe1 49.63(11) . . ?
C9 Fe2 Fe1 166.23(13) . . ?
C11 Fe2 Fe1 102.38(13) . . ?
C10 Fe2 Fe1 133.26(16) . . ?
C13 Fe2 Fe1 132.36(16) . . ?
C12 Fe2 Fe1 102.53(13) . . ?
P1 Fe2 Fe1 107.52(4) . . ?
C18 P1 C14 100.6(2) . . ?
C18 P1 C22 101.7(2) . . ?
C14 P1 C22 101.29(19) . . ?
C18 P1 Fe2 109.90(15) . . ?
C14 P1 Fe2 120.37(15) . . ?
C22 P1 Fe2 119.91(13) . . ?
C16 O5 C17 113.9(4) . . ?
C20 O7 C21 114.9(4) . . ?
O1 C1 Fe1 170.7(4) . . ?
O2 C2 Fe2 140.0(3) . . ?
O2 C2 Fe1 137.9(3) . . ?
Fe2 C2 Fe1 82.01(15) . . ?
O3 C3 Fe2 141.4(3) . . ?
O3 C3 Fe1 135.8(3) . . ?
Fe2 C3 Fe1 82.53(16) . . ?
C8 C4 C5 107.2(4) . . ?
C8 C4 Fe1 68.8(2) . . ?
C5 C4 Fe1 71.0(2) . . ?
C8 C4 H4 126.4 . . ?
C5 C4 H4 126.4 . . ?
Fe1 C4 H4 125.5 . . ?
C4 C5 C6 108.9(4) . . ?
C4 C5 Fe1 70.7(2) . . ?
C6 C5 Fe1 70.7(2) . . ?
C4 C5 H5 125.6 . . ?
C6 C5 H5 125.6 . . ?
Fe1 C5 H5 124.6 . . ?
C7 C6 C5 107.6(4) . . ?
C7 C6 Fe1 69.4(2) . . ?
C5 C6 Fe1 70.8(2) . . ?
C7 C6 H6 126.2 . . ?
C5 C6 H6 126.2 . . ?
Fe1 C6 H6 125.1 . . ?
C6 C7 C8 107.8(4) . . ?
C6 C7 Fe1 72.1(2) . . ?
C8 C7 Fe1 69.5(2) . . ?
C6 C7 H7 126.1 . . ?
C8 C7 H7 126.1 . . ?
Fe1 C7 H7 123.8 . . ?
C4 C8 C7 108.5(4) . . ?
C4 C8 Fe1 72.6(2) . . ?
C7 C8 Fe1 70.9(2) . . ?
C4 C8 H8 125.8 . . ?
C7 C8 H8 125.8 . . ?
Fe1 C8 H8 122.5 . . ?
C13 C9 C10 108.8(4) . . ?
C13 C9 Fe2 71.9(3) . . ?
C10 C9 Fe2 70.7(2) . . ?
C13 C9 H9 125.6 . . ?
C10 C9 H9 125.6 . . ?
Fe2 C9 H9 123.3 . . ?
C11 C10 C9 106.0(4) . . ?
C11 C10 Fe2 70.2(2) . . ?
C9 C10 Fe2 69.8(3) . . ?
C11 C10 H10 127 . . ?
C9 C10 H10 127 . . ?
Fe2 C10 H10 124.6 . . ?
C12 C11 C10 108.4(4) . . ?
C12 C11 Fe2 71.6(3) . . ?
C10 C11 Fe2 70.6(3) . . ?
C12 C11 H11 125.8 . . ?
C10 C11 H11 125.8 . . ?
Fe2 C11 H11 123.6 . . ?
C13 C12 C11 108.4(4) . . ?
C13 C12 Fe2 70.9(3) . . ?
C11 C12 Fe2 69.8(3) . . ?
C13 C12 H12 125.8 . . ?
C11 C12 H12 125.8 . . ?
Fe2 C12 H12 125.1 . . ?
C12 C13 C9 108.4(5) . . ?
C12 C13 Fe2 71.2(3) . . ?
C9 C13 Fe2 69.8(3) . . ?
C12 C13 H13 125.8 . . ?
C9 C13 H13 125.8 . . ?
Fe2 C13 H13 124.9 . . ?
C15 C14 P1 137.4(5) . . ?
C15 C14 H14 110(4) . . ?
P1 C14 H14 112(4) . . ?
C14 C15 C16 130.6(6) . . ?
C14 C15 H15 117(3) . . ?
C16 C15 H15 113(3) . . ?
O4 C16 O5 124.6(4) . . ?
O4 C16 C15 125.1(5) . . ?
O5 C16 C15 110.3(4) . . ?
O5 C17 H17A 109.5 . . ?
O5 C17 H17B 109.5 . . ?
H17A C17 H17B 109.5 . . ?
O5 C17 H17C 109.5 . . ?
H17A C17 H17C 109.5 . . ?
H17B C17 H17C 109.5 . . ?
C19 C18 P1 167.7(6) . . ?
C18 C19 C20 165.1(7) . . ?
O6 C20 O7 125.5(4) . . ?
O6 C20 C19 123.2(5) . . ?
O7 C20 C19 111.3(5) . . ?
O7 C21 H21A 109.5 . . ?
O7 C21 H21B 109.5 . . ?
H21A C21 H21B 109.5 . . ?
O7 C21 H21C 109.5 . . ?
H21A C21 H21C 109.5 . . ?
H21B C21 H21C 109.5 . . ?
C23 C22 C27 111.4(3) . . ?
C23 C22 P1 113.7(3) . . ?
C27 C22 P1 110.7(3) . . ?
C23 C22 H22 106.9 . . ?
C27 C22 H22 106.9 . . ?
P1 C22 H22 106.9 . . ?
C24 C23 C22 110.7(4) . . ?
C24 C23 H23A 109.5 . . ?
C22 C23 H23A 109.5 . . ?
C24 C23 H23B 109.5 . . ?
C22 C23 H23B 109.5 . . ?
H23A C23 H23B 108.1 . . ?
C25 C24 C23 111.5(4) . . ?
C25 C24 H24A 109.3 . . ?
C23 C24 H24A 109.3 . . ?
C25 C24 H24B 109.3 . . ?
C23 C24 H24B 109.3 . . ?
H24A C24 H24B 108 . . ?
C24 C25 C26 110.4(4) . . ?
C24 C25 H25A 109.6 . . ?
C26 C25 H25A 109.6 . . ?
C24 C25 H25B 109.6 . . ?
C26 C25 H25B 109.6 . . ?
H25A C25 H25B 108.1 . . ?
C27 C26 C25 111.0(4) . . ?
C27 C26 H26A 109.4 . . ?
C25 C26 H26A 109.4 . . ?
C27 C26 H26B 109.4 . . ?
C25 C26 H26B 109.4 . . ?
H26A C26 H26B 108 . . ?
C26 C27 C22 109.9(4) . . ?
C26 C27 H27A 109.7 . . ?
C22 C27 H27A 109.7 . . ?
C26 C27 H27B 109.7 . . ?
C22 C27 H27B 109.7 . . ?
H27A C27 H27B 108.2 . . ?
Cl1 C98 Cl2 144.3(12) . . ?
Cl1 C98 H98A 100.8 . . ?
Cl2 C98 H98A 100.8 . . ?
Cl1 C98 H98B 100.8 . . ?
Cl2 C98 H98B 100.8 . . ?
H98A C98 H98B 104.4 . . ?
Cl2B C98B Cl1B 102.0(14) . . ?
Cl2B C98B H98C 111.4 . . ?
Cl1B C98B H98C 111.4 . . ?
Cl2B C98B H98D 111.4 . . ?
Cl1B C98B H98D 111.4 . . ?
H98C C98B H98D 109.2 . . ?
Cl1B Cl1B C98B 128.9(17) 3_566 . ?
 
# END of CIF
